# Supplementary material
Source: publisher figshare collection journal article supplement (https://frontiersin.figshare.com/ndownloader/files/22538207)
Supplement: Supplementary file 1 [file 22538207]

Table S2. List of Arctic sea-ice and pelagic protist taxa recorded from 1980 to 2015 in the Amerasian Basin, Siberian Shelf-Slope, Transpolar Drift, and North of Svalbard datasets for first-year ice (FYI), multiyear ice (MYI) and all samples (All). Taxa are sorted alphabetically by group and abundance percentage (AP) for all samples. Frequency of occurrence (FO) is also indicated.

|  |  |  |  |  |  |  |
| --- | --- | --- | --- | --- | --- | --- |
|  | FYI | | MYI | | All | |
| Taxa | AP | FO | AP | FO | AP | FO |
| **Centric diatoms** |  |  |  |  |  |  |
| *Attheya decora* | 0.0 | 0.8 | 0.0 | 1.0 | 0.0 | 0.9 |
| *Attheya septentrionalis* | 0.3 | 35.0 | 2.0 | 53.5 | 1.0 | 43.3 |
| *Attheya* spp. | 0.2 | 4.9 | 0.3 | 3.0 | 0.2 | 4.0 |
| *Aulacoseira alpigena* | 0.0 | 0.0 | 0.1 | 8.9 | 0.0 | 4.0 |
| *Aulacoseira* spp. | 0.0 | 0.0 | 0.0 | 2.0 | 0.0 | 0.9 |
| *Bacterosira bathyomphala* | 0.0 | 3.3 | 0.0 | 1.0 | 0.0 | 2.2 |
| *Chaetoceros atlanticus* | 0.0 | 0.8 | 0.0 | 1.0 | 0.0 | 0.9 |
| *Chaetoceros concavicornis* | 0.0 | 0.8 | 0.0 | 3.0 | 0.0 | 1.8 |
| *Chaetoceros contortus* | 0.1 | 1.6 | 0.2 | 2.0 | 0.1 | 1.8 |
| *Chaetoceros convolutus* | 0.0 | 0.8 | 0.0 | 1.0 | 0.0 | 0.9 |
| *Chaetoceros decipiens* | 0.2 | 3.3 | 0.1 | 2.0 | 0.1 | 2.7 |
| *Chaetoceros diadema* | 0.2 | 3.3 | 0.1 | 3.0 | 0.1 | 3.1 |
| *Chaetoceros fragilis* | 0.0 | 0.8 | 0.0 | 0.0 | 0.0 | 0.4 |
| *Chaetoceros furcillatus* | 0.1 | 4.1 | 0.0 | 3.0 | 0.1 | 3.6 |
| *Chaetoceros gelidus* | 0.8 | 38.2 | 0.1 | 5.9 | 0.5 | 23.7 |
| *Chaetoceros holsaticus* | 0.0 | 0.8 | 0.0 | 0.0 | 0.0 | 0.4 |
| *Chaetoceros ingolfianus* | 0.2 | 1.6 | 0.1 | 1.0 | 0.2 | 1.3 |
| *Chaetoceros neogracilis* | 0.0 | 0.0 | 0.2 | 9.9 | 0.1 | 4.5 |
| *Chaetoceros simplex* | 0.0 | 0.8 | 0.0 | 0.0 | 0.0 | 0.4 |
| *Chaetoceros* spp. | 0.0 | 2.4 | 0.0 | 1.0 | 0.0 | 1.8 |
| *Chaetoceros tenuissimus* | 0.1 | 13.8 | 0.0 | 1.0 | 0.1 | 8.0 |
| *Conticribra weissflogii* | 0.5 | 41.5 | 0.0 | 0.0 | 0.3 | 22.8 |
| *Coscinodiscus oculus-iridis* | 0.0 | 0.0 | 0.0 | 18.8 | 0.0 | 8.5 |
| *Detonula confervacea* | 0.0 | 0.0 | 0.0 | 1.0 | 0.0 | 0.4 |
| *Lennoxia faveolata* | 0.0 | 0.8 | 0.0 | 0.0 | 0.0 | 0.4 |
| *Leptocylindrus minimus* | 0.0 | 0.0 | 0.2 | 3.0 | 0.1 | 1.3 |
| *Melosira arctica* | 0.0 | 1.6 | 1.7 | 19.8 | 0.8 | 9.8 |
| *Odontella aurita* | 0.0 | 1.6 | 0.0 | 0.0 | 0.0 | 0.9 |
| *Porosira glacialis* | 0.8 | 39.8 | 0.0 | 0.0 | 0.4 | 21.9 |
| *Proboscia alata* | 0.0 | 0.8 | 0.0 | 1.0 | 0.0 | 0.9 |
| *Rhizosolenia hebetata* | 0.0 | 0.8 | 0.0 | 2.0 | 0.0 | 1.3 |
| *Rhizosolenia hebetata* f. *semispina* | 0.1 | 0.8 | 0.0 | 2.0 | 0.0 | 1.3 |
| *Rhizosolenia setigera* | 0.0 | 0.0 | 0.0 | 2.0 | 0.0 | 0.9 |
| *Rhizosolenia* spp. | 0.0 | 0.8 | 0.0 | 0.0 | 0.0 | 0.4 |
| *Shionodiscus bioculatus* | 0.2 | 6.5 | 0.0 | 2.0 | 0.1 | 4.5 |
| *Thalassiosira angulata* | 0.0 | 0.8 | 0.0 | 0.0 | 0.0 | 0.4 |
| *Thalassiosira antarctica* | 0.0 | 0.0 | 0.1 | 3.0 | 0.0 | 1.3 |
| *Thalassiosira antarctica* var. *borealis* | 0.1 | 3.3 | 0.1 | 1.0 | 0.1 | 2.2 |
| *Thalassiosira bulbosa* | 0.0 | 0.8 | 0.4 | 5.0 | 0.2 | 2.7 |
| *Thalassiosira decipiens* | 0.0 | 0.0 | 0.2 | 15.8 | 0.1 | 7.1 |
| *Thalassiosira gravida* | 0.9 | 43.1 | 0.0 | 5.9 | 0.5 | 26.3 |
| *Thalassiosira hyalina* | 0.0 | 7.3 | 0.0 | 1.0 | 0.0 | 4.5 |
| *Thalassiosira nordenskioeldii* | 0.0 | 6.5 | 1.1 | 35.6 | 0.5 | 19.6 |
| *Thalassiosira* spp. | 0.3 | 20.3 | 0.5 | 10.9 | 0.4 | 16.1 |
| **Pennate diatoms** |  |  |  |  |  |  |
| *Achnanthes* spp. | 0.0 | 0.8 | 0.0 | 1.0 | 0.0 | 0.9 |
| *Amphipleura pellucida* | 0.0 | 0.0 | 0.0 | 3.0 | 0.0 | 1.3 |
| *Amphora angusta* var. *ventricosa* | 0.0 | 0.0 | 0.0 | 7.9 | 0.0 | 3.6 |
| *Amphora crassa* | 0.0 | 0.0 | 0.1 | 14.9 | 0.0 | 6.7 |
| *Amphora hyalina* | 0.0 | 0.0 | 0.0 | 1.0 | 0.0 | 0.4 |
| *Amphora laevis* var. *laevissima* | 0.0 | 0.0 | 0.0 | 6.9 | 0.0 | 3.1 |
| *Amphora lineolata* | 0.0 | 0.0 | 0.0 | 2.0 | 0.0 | 0.9 |
| *Amphora obtusa* | 0.0 | 0.0 | 0.0 | 1.0 | 0.0 | 0.4 |
| *Amphora ovalis* | 0.0 | 0.0 | 0.0 | 15.8 | 0.0 | 7.1 |
| *Amphora ovalis* var. *gracilis* | 0.0 | 0.0 | 0.0 | 9.9 | 0.0 | 4.5 |
| *Amphora pediculus* | 0.0 | 0.0 | 0.2 | 22.8 | 0.1 | 10.3 |
| *Amphora proteus* | 0.0 | 0.0 | 0.0 | 1.0 | 0.0 | 0.4 |
| *Amphora* spp. | 0.0 | 0.0 | 0.0 | 4.0 | 0.0 | 1.8 |
| *Asterionella* cf. *bleakeleyi* | 0.0 | 0.0 | 0.1 | 2.0 | 0.1 | 0.9 |
| *Asterionella formosa* | 0.0 | 0.0 | 0.0 | 1.0 | 0.0 | 0.4 |
| *Bacillaria paxillifera* var. *tumidula* | 0.0 | 0.0 | 0.0 | 2.0 | 0.0 | 0.9 |
| *Bacillaria socialis* | 0.0 | 0.0 | 0.0 | 2.0 | 0.0 | 0.9 |
| *Biremis ambigua* | 0.0 | 0.0 | 0.0 | 1.0 | 0.0 | 0.4 |
| *Brebissonia* spp. | 0.0 | 0.0 | 0.0 | 5.0 | 0.0 | 2.2 |
| *Caloneis* spp. | 0.0 | 0.0 | 0.0 | 1.0 | 0.0 | 0.4 |
| *Catenula* spp. | 0.2 | 17.1 | 0.0 | 2.0 | 0.1 | 10.3 |
| *Cocconeis scutellum* | 0.0 | 0.8 | 0.1 | 5.0 | 0.0 | 2.7 |
| *Cocconeis* spp. | 0.0 | 0.8 | 0.0 | 5.0 | 0.0 | 2.7 |
| *Cosmioneis pusilla* | 0.0 | 0.0 | 0.3 | 27.7 | 0.1 | 12.5 |
| *Craspedopleura kryophila* | 0.0 | 3.3 | 0.1 | 9.9 | 0.0 | 6.2 |
| *Cylindrotheca closterium* | 1.2 | 73.2 | 1.6 | 46.5 | 1.4 | 61.2 |
| *Cylindrotheca* spp. | 0.0 | 3.3 | 0.1 | 3.0 | 0.0 | 3.1 |
| *Diploneis didyma* | 0.0 | 0.0 | 0.0 | 1.0 | 0.0 | 0.4 |
| *Diploneis litoralis* | 0.0 | 0.0 | 0.3 | 24.8 | 0.1 | 11.2 |
| *Diploneis litoralis* var. *arctica* | 0.0 | 0.0 | 0.4 | 11.9 | 0.2 | 5.4 |
| *Diploneis litoralis* var. *clathrata* | 0.2 | 7.3 | 0.1 | 14.9 | 0.1 | 10.7 |
| *Entomoneis gigantea* | 0.0 | 0.0 | 0.0 | 6.9 | 0.0 | 3.1 |
| *Entomoneis gigantea* var. *septentrionalis* | 0.0 | 0.0 | 0.0 | 4.0 | 0.0 | 1.8 |
| *Entomoneis kjellmanii* | 0.1 | 13.8 | 0.1 | 26.7 | 0.1 | 19.6 |
| *Entomoneis kjellmanii* var. *kariana* | 0.0 | 4.1 | 0.0 | 5.9 | 0.0 | 4.9 |
| *Entomoneis kjellmanii* var. *subtilis* | 0.0 | 0.8 | 0.0 | 5.0 | 0.0 | 2.7 |
| *Entomoneis paludosa* | 0.2 | 31.7 | 0.0 | 16.8 | 0.1 | 25.0 |
| *Entomoneis paludosa* var. *hyperborea* | 0.0 | 0.8 | 0.1 | 19.8 | 0.1 | 9.4 |
| *Entomoneis* spp. | 0.0 | 0.0 | 0.0 | 4.0 | 0.0 | 1.8 |
| *Eunotia* spp. | 0.0 | 0.0 | 0.0 | 17.8 | 0.0 | 8.0 |
| *Fallacia forcipata* | 0.0 | 0.0 | 0.3 | 24.8 | 0.1 | 11.2 |
| *Fallacia forcipata* var. *densestriata* | 0.0 | 0.8 | 0.1 | 2.0 | 0.0 | 1.3 |
| *Fogedia finmarchica* | 0.0 | 0.0 | 0.0 | 1.0 | 0.0 | 0.4 |
| *Fossula arctica* | 1.0 | 43.1 | 2.0 | 3.0 | 1.5 | 25.0 |
| *Fragilaria islandica* | 0.0 | 0.0 | 0.7 | 2.0 | 0.3 | 0.9 |
| *Fragilaria* spp. | 0.1 | 1.6 | 0.0 | 0.0 | 0.0 | 0.9 |
| *Fragilariopsis cylindrus* | 11.7 | 71.5 | 2.5 | 46.5 | 7.6 | 60.3 |
| *Fragilariopsis oceanica* | 0.5 | 23.6 | 6.6 | 51.5 | 3.3 | 36.2 |
| *Fragilariopsis pseudonana* | 0.1 | 4.1 | 0.1 | 4.0 | 0.1 | 4.0 |
| *Fragilariopsis reginae-jahniae* | 0.4 | 19.5 | 0.0 | 1.0 | 0.2 | 11.2 |
| *Fragilariopsis* spp. | 0.0 | 1.6 | 0.0 | 3.0 | 0.0 | 2.2 |
| *Gomphoneis exigua* | 0.0 | 0.0 | 0.5 | 27.7 | 0.2 | 12.5 |
| *Gomphonema acuminatum* | 0.0 | 0.0 | 0.0 | 1.0 | 0.0 | 0.4 |
| *Gyrosigma concilians* | 0.0 | 0.0 | 0.0 | 3.0 | 0.0 | 1.3 |
| *Gyrosigma* spp. | 0.0 | 4.1 | 0.1 | 3.0 | 0.1 | 3.6 |
| *Halamphora exigua* | 0.0 | 0.0 | 0.0 | 19.8 | 0.0 | 8.9 |
| *Hantzschia weyprechtii* | 0.0 | 13.8 | 0.0 | 10.9 | 0.0 | 12.5 |
| *Haslea crucigeroides* | 0.0 | 7.3 | 0.0 | 2.0 | 0.0 | 4.9 |
| *Haslea crystallina* | 0.0 | 0.0 | 0.0 | 9.9 | 0.0 | 4.5 |
| *Haslea spicula* | 0.0 | 6.5 | 0.0 | 5.0 | 0.0 | 5.8 |
| *Haslea* spp. | 0.0 | 4.1 | 0.0 | 0.0 | 0.0 | 2.2 |
| *Haslea vitrea* | 0.0 | 0.8 | 0.0 | 2.0 | 0.0 | 1.3 |
| *Kurpiszia kryokonites* | 0.1 | 2.4 | 0.0 | 3.0 | 0.0 | 2.7 |
| *Licmophora* spp. | 0.0 | 0.0 | 0.0 | 3.0 | 0.0 | 1.3 |
| *Manguinea* spp. | 0.0 | 0.0 | 0.0 | 1.0 | 0.0 | 0.4 |
| *Navicula algida* | 0.0 | 4.1 | 0.1 | 8.9 | 0.1 | 6.2 |
| *Navicula bipennata* | 0.0 | 0.0 | 0.0 | 10.9 | 0.0 | 4.9 |
| *Navicula cryptocephala* | 0.0 | 0.0 | 0.0 | 2.0 | 0.0 | 0.9 |
| *Navicula debilissima* | 0.0 | 0.0 | 0.0 | 1.0 | 0.0 | 0.4 |
| *Navicula directa* | 0.2 | 42.3 | 0.6 | 62.4 | 0.4 | 51.3 |
| *Navicula distans* | 0.0 | 1.6 | 0.0 | 3.0 | 0.0 | 2.2 |
| *Navicula gelida* | 0.0 | 6.5 | 0.0 | 22.8 | 0.0 | 13.8 |
| *Navicula granii* | 0.0 | 1.6 | 0.2 | 4.0 | 0.1 | 2.7 |
| *Navicula kariana* | 0.0 | 27.6 | 0.2 | 39.6 | 0.1 | 33.0 |
| *Navicula kariana* var. *detersa* | 0.0 | 0.0 | 0.0 | 1.0 | 0.0 | 0.4 |
| *Navicula kepesii* | 0.0 | 0.0 | 0.0 | 4.0 | 0.0 | 1.8 |
| *Navicula novadecipiens* | 0.0 | 0.0 | 0.0 | 1.0 | 0.0 | 0.4 |
| *Navicula obtusa* | 0.0 | 0.8 | 0.0 | 0.0 | 0.0 | 0.4 |
| *Navicula oestrupii* | 0.0 | 0.8 | 0.0 | 0.0 | 0.0 | 0.4 |
| *Navicula pelagica* | 2.1 | 48.8 | 2.5 | 24.8 | 2.3 | 37.9 |
| *Navicula pellucidula* | 0.0 | 0.8 | 0.0 | 0.0 | 0.0 | 0.4 |
| *Navicula retusa* var. *cancellata* | 0.0 | 0.0 | 0.2 | 26.7 | 0.1 | 12.1 |
| *Navicula rotaeana* | 0.0 | 0.0 | 0.0 | 9.9 | 0.0 | 4.5 |
| *Navicula septentrionalis* | 0.0 | 1.6 | 0.0 | 2.0 | 0.0 | 1.8 |
| *Navicula* spp. | 0.4 | 31.7 | 1.0 | 42.6 | 0.7 | 36.6 |
| *Navicula superba* | 0.0 | 0.0 | 0.0 | 8.9 | 0.0 | 4.0 |
| *Navicula transitans* | 3.0 | 64.2 | 0.3 | 41.6 | 1.8 | 54.0 |
| *Navicula transitans* var. *asymmetrica* | 0.0 | 0.0 | 0.0 | 5.9 | 0.0 | 2.7 |
| *Navicula transitans* var. *derasa* | 0.2 | 4.1 | 0.2 | 16.8 | 0.2 | 9.8 |
| *Navicula trigonocephala* | 0.1 | 2.4 | 0.1 | 5.0 | 0.1 | 3.6 |
| *Navicula valida* | 0.0 | 0.0 | 0.2 | 21.8 | 0.1 | 9.8 |
| *Navicula valida* var. *minuta* | 0.0 | 1.6 | 0.0 | 5.9 | 0.0 | 3.6 |
| *Navicula vanhoeffenii* | 0.0 | 8.1 | 1.1 | 26.7 | 0.5 | 16.5 |
| *Nitzschia acicularis* | 0.0 | 0.0 | 0.4 | 22.8 | 0.2 | 10.3 |
| *Nitzschia angularis* | 0.0 | 0.0 | 0.0 | 1.0 | 0.0 | 0.4 |
| *Nitzschia arctica* | 0.6 | 5.7 | 0.7 | 17.8 | 0.7 | 11.2 |
| *Nitzschia brebissonii* | 0.0 | 0.0 | 0.0 | 9.9 | 0.0 | 4.5 |
| *Nitzschia frigida* | 11.2 | 87.0 | 17.1 | 55.4 | 13.9 | 72.8 |
| *Nitzschia laevissima* | 0.0 | 0.8 | 0.1 | 8.9 | 0.0 | 4.5 |
| *Nitzschia lanceolata/Synedropsis* sp. | 0.0 | 0.8 | 0.2 | 1.0 | 0.1 | 0.9 |
| *Nitzschia leavissima* | 0.0 | 22.0 | 0.0 | 9.9 | 0.0 | 16.5 |
| *Nitzschia longissima* | 0.0 | 9.8 | 0.6 | 50.5 | 0.3 | 28.1 |
| *Nitzschia neofrigida* | 0.2 | 8.9 | 3.3 | 24.8 | 1.6 | 16.1 |
| *Nitzschia pellucida* | 0.0 | 0.0 | 1.1 | 12.9 | 0.5 | 5.8 |
| *Nitzschia polaris* | 0.4 | 4.9 | 3.6 | 28.7 | 1.8 | 15.6 |
| *Nitzschia promare* | 0.2 | 13.0 | 0.9 | 17.8 | 0.5 | 15.2 |
| *Nitzschia scabra* | 0.0 | 0.0 | 0.0 | 3.0 | 0.0 | 1.3 |
| *Nitzschia scalpelliformis* | 0.0 | 0.0 | 0.0 | 1.0 | 0.0 | 0.4 |
| *Nitzschia sigma* | 0.0 | 0.0 | 0.0 | 11.9 | 0.0 | 5.4 |
| *Nitzschia* spp. | 1.0 | 19.5 | 11.6 | 65.3 | 5.8 | 40.2 |
| *Nitzschia tenuirostris* | 0.0 | 0.8 | 0.0 | 1.0 | 0.0 | 0.9 |
| *Pauliella taeniata* | 0.1 | 3.3 | 0.2 | 10.9 | 0.1 | 6.7 |
| *Petroneis glacialis* | 0.0 | 0.0 | 0.0 | 3.0 | 0.0 | 1.3 |
| *Phaeodactylum tricornutum* | 0.0 | 0.0 | 0.0 | 1.0 | 0.0 | 0.4 |
| *Pinnularia punctulata* | 0.0 | 0.0 | 0.0 | 4.0 | 0.0 | 1.8 |
| *Pinnularia quadratarea* | 0.0 | 0.0 | 0.1 | 15.8 | 0.0 | 7.1 |
| *Pinnularia quadratarea* var. *bicontracta* | 0.0 | 0.0 | 0.0 | 1.0 | 0.0 | 0.4 |
| *Pinnularia quadratarea* var. *capitata* | 0.0 | 0.8 | 0.0 | 1.0 | 0.0 | 0.9 |
| *Pinnularia quadratarea* var. *densestriata* | 0.0 | 0.0 | 0.0 | 1.0 | 0.0 | 0.4 |
| *Pinnularia quadratarea* var. *dubia* | 0.0 | 1.6 | 0.0 | 1.0 | 0.0 | 1.3 |
| *Pinnularia quadratarea* var. *interrupta* | 0.0 | 0.0 | 0.0 | 2.0 | 0.0 | 0.9 |
| *Pinnularia quadratarea* var. *minor* | 0.0 | 0.8 | 0.0 | 1.0 | 0.0 | 0.9 |
| *Pinnularia quadratarea* var. *subglabra* | 0.0 | 0.8 | 0.0 | 2.0 | 0.0 | 1.3 |
| *Pinnularia semiinflata* | 0.0 | 0.8 | 0.0 | 7.9 | 0.0 | 4.0 |
| *Pinnularia spitsbergensis* | 0.0 | 0.0 | 0.0 | 3.0 | 0.0 | 1.3 |
| *Pinnularia* spp. | 0.0 | 0.0 | 0.3 | 6.9 | 0.2 | 3.1 |
| *Placoneis elginensis* | 0.0 | 0.0 | 0.0 | 13.9 | 0.0 | 6.2 |
| *Placoneis gastrum* | 0.0 | 0.0 | 0.0 | 13.9 | 0.0 | 6.2 |
| *Plagiotropis lepidoptera* | 0.0 | 0.0 | 0.0 | 4.0 | 0.0 | 1.8 |
| *Pleurosigma elongatum* | 0.0 | 0.0 | 0.2 | 25.7 | 0.1 | 11.6 |
| *Pleurosigma* spp. | 0.0 | 0.8 | 0.0 | 2.0 | 0.0 | 1.3 |
| *Pleurosigma stuxbergii* | 0.0 | 4.1 | 0.0 | 4.0 | 0.0 | 4.0 |
| *Psammodictyon panduriforme* var. *delicatulum* | 0.0 | 0.8 | 0.0 | 0.0 | 0.0 | 0.4 |
| *Pseudogomphonema arcticum* | 0.0 | 1.6 | 0.0 | 6.9 | 0.0 | 4.0 |
| *Pseudogomphonema groenlandicum* | 0.0 | 0.0 | 0.3 | 26.7 | 0.1 | 12.1 |
| *Pseudogomphonema kamtschaticum* | 0.0 | 1.6 | 0.0 | 2.0 | 0.0 | 1.8 |
| *Pseudogomphonema septentrionale* | 0.0 | 0.0 | 0.0 | 2.0 | 0.0 | 0.9 |
| *Pseudo-nitzschia delicatissima* | 7.1 | 74.0 | 1.3 | 26.7 | 4.5 | 52.7 |
| *Pseudo-nitzschia granii* | 0.2 | 20.3 | 0.1 | 6.9 | 0.1 | 14.3 |
| *Pseudo-nitzschia seriata* | 0.2 | 17.9 | 0.7 | 8.9 | 0.4 | 13.8 |
| *Pseudo-nitzschia* spp. | 0.2 | 6.5 | 0.0 | 0.0 | 0.1 | 3.6 |
| *Rhoicosigma arcticum* | 0.0 | 0.8 | 0.1 | 8.9 | 0.0 | 4.5 |
| *Stauroneis anceps* | 0.0 | 0.0 | 0.5 | 3.0 | 0.2 | 1.3 |
| *Stauroneis phoenicenteron* | 0.0 | 0.0 | 0.0 | 1.0 | 0.0 | 0.4 |
| *Stauroneis radissonii* | 0.8 | 51.2 | 0.2 | 17.8 | 0.6 | 36.2 |
| *Stauroneis* spp. | 0.0 | 0.8 | 0.0 | 1.0 | 0.0 | 0.9 |
| *Staurosirella pinnata* | 0.0 | 0.0 | 0.1 | 3.0 | 0.0 | 1.3 |
| *Stenoneis inconspicua* var. *baculus* | 0.0 | 0.8 | 0.0 | 1.0 | 0.0 | 0.9 |
| *Stenoneis obtuserostrata* | 0.0 | 7.3 | 0.0 | 12.9 | 0.0 | 9.8 |
| *Stenoneis* spp. | 0.0 | 0.0 | 0.0 | 1.0 | 0.0 | 0.4 |
| *Surirella* spp. | 0.0 | 0.0 | 0.1 | 1.0 | 0.0 | 0.4 |
| *Synedra* spp. | 0.0 | 0.0 | 0.0 | 1.0 | 0.0 | 0.4 |
| *Synedropsis hyperborea* | 0.8 | 54.5 | 1.3 | 31.7 | 1.0 | 44.2 |
| *Synedropsis* spp. | 0.0 | 1.6 | 0.0 | 0.0 | 0.0 | 0.9 |
| *Thalassionema nitzschioides* | 0.0 | 0.0 | 0.0 | 1.0 | 0.0 | 0.4 |
| *Thalassiothrix* spp. | 0.0 | 0.0 | 0.3 | 3.0 | 0.1 | 1.3 |
| *Trachyneis aspera* | 0.0 | 0.0 | 0.0 | 1.0 | 0.0 | 0.4 |
| **Dinoflagellates** |  |  |  |  |  |  |
| *Alexandrium* spp. | 0.0 | 2.4 | 0.0 | 0.0 | 0.0 | 1.3 |
| *Amphidinium crassum* | 0.0 | 0.8 | 0.0 | 0.0 | 0.0 | 0.4 |
| *Amphidinium* spp. | 0.3 | 4.9 | 0.0 | 0.0 | 0.2 | 2.7 |
| *Amylax triacantha* | 0.0 | 0.0 | 0.1 | 2.0 | 0.0 | 0.9 |
| *Azadinium* spp. | 0.0 | 0.8 | 0.0 | 0.0 | 0.0 | 0.4 |
| *Cochlodinium* spp. | 0.0 | 1.6 | 0.0 | 0.0 | 0.0 | 0.9 |
| *Dinophysis arctica* | 0.0 | 1.6 | 0.0 | 1.0 | 0.0 | 1.3 |
| *Dinophysis norvegica* | 0.0 | 0.0 | 0.0 | 1.0 | 0.0 | 0.4 |
| *Dinophysis* spp. | 0.0 | 0.0 | 0.0 | 2.0 | 0.0 | 0.9 |
| *Gonyaulax* spp. | 0.0 | 0.0 | 0.0 | 2.0 | 0.0 | 0.9 |
| *Gymnodinium arcticum* | 0.0 | 3.3 | 0.0 | 1.0 | 0.0 | 2.2 |
| *Gymnodinium galeatum* | 0.1 | 1.6 | 0.0 | 0.0 | 0.0 | 0.9 |
| *Gymnodinium gracilentum* | 0.3 | 16.3 | 0.0 | 4.0 | 0.2 | 10.7 |
| *Gymnodinium simplex* | 0.1 | 4.9 | 0.0 | 1.0 | 0.0 | 3.1 |
| *Gymnodinium* spp. | 2.1 | 56.9 | 0.1 | 12.9 | 1.2 | 37.1 |
| *Gymnodinium wulffii* | 0.0 | 3.3 | 0.0 | 2.0 | 0.0 | 2.7 |
| *Gyrodinium* spp. | 0.0 | 1.6 | 0.0 | 5.9 | 0.0 | 3.6 |
| *Heterocapsa arctica* | 0.1 | 8.9 | 0.0 | 4.0 | 0.1 | 6.7 |
| *Heterocapsa rotundata* | 0.0 | 0.8 | 0.0 | 1.0 | 0.0 | 0.9 |
| *Heterocapsa* spp. | 0.6 | 30.1 | 0.0 | 3.0 | 0.3 | 17.9 |
| *Lessardia elongata* | 0.0 | 0.8 | 0.0 | 0.0 | 0.0 | 0.4 |
| *Oxyrrhis* spp. | 0.0 | 7.3 | 0.0 | 0.0 | 0.0 | 4.0 |
| *Peridinium quadridentatum* | 0.0 | 0.0 | 0.0 | 7.9 | 0.0 | 3.6 |
| *Phalacroma rotundatum* | 0.0 | 0.0 | 0.0 | 1.0 | 0.0 | 0.4 |
| *Polarella glacialis* | 8.3 | 65.9 | 0.8 | 16.8 | 4.9 | 43.8 |
| *Prorocentrum cordatum* | 0.0 | 1.6 | 0.0 | 2.0 | 0.0 | 1.8 |
| *Protoperidinium bipes* | 0.0 | 0.0 | 0.0 | 1.0 | 0.0 | 0.4 |
| *Protoperidinium brevipes* | 0.0 | 0.8 | 0.0 | 1.0 | 0.0 | 0.9 |
| *Protoperidinium depressum* | 0.0 | 0.8 | 0.0 | 0.0 | 0.0 | 0.4 |
| *Protoperidinium pallidum* | 0.0 | 0.0 | 0.0 | 1.0 | 0.0 | 0.4 |
| *Protoperidinium* spp. | 0.0 | 2.4 | 0.0 | 3.0 | 0.0 | 2.7 |
| *Protoperidinium thorianum* | 0.0 | 0.0 | 0.0 | 1.0 | 0.0 | 0.4 |
| *Scrippsiella acuminata* | 0.0 | 0.8 | 0.0 | 1.0 | 0.0 | 0.9 |
| **Flagellates** |  |  |  |  |  |  |
| *Algirosphaera robusta* | 0.0 | 1.6 | 0.0 | 1.0 | 0.0 | 1.3 |
| *Anisonema* spp. | 0.0 | 0.0 | 0.0 | 3.0 | 0.0 | 1.3 |
| *Chlamydomonas nivalis* | 0.0 | 0.0 | 2.0 | 32.7 | 0.9 | 14.7 |
| *Cryocystis brevispina* | 0.0 | 0.0 | 1.6 | 17.8 | 0.7 | 8.0 |
| *Cryptomonas* spp. | 0.2 | 20.3 | 0.0 | 1.0 | 0.1 | 11.6 |
| *Diacronema lutheri* | 0.5 | 7.3 | 0.0 | 0.0 | 0.3 | 4.0 |
| *Dinobryon faculiferum* | 0.0 | 14.6 | 0.0 | 4.0 | 0.0 | 9.8 |
| *Dinobryon* spp. | 1.1 | 41.5 | 0.1 | 9.9 | 0.7 | 27.2 |
| *Emiliania huxleyi* | 0.0 | 4.1 | 0.0 | 0.0 | 0.0 | 2.2 |
| *Groenlandiella brevispina* | 2.0 | 2.4 | 2.1 | 13.9 | 2.0 | 7.6 |
| *Groenlandiella* spp. | 0.0 | 0.0 | 0.0 | 4.0 | 0.0 | 1.8 |
| *Leucocryptos marina* | 0.0 | 2.4 | 0.0 | 0.0 | 0.0 | 1.3 |
| *Leucocryptos remigera* | 0.0 | 0.8 | 0.0 | 0.0 | 0.0 | 0.4 |
| *Meringosphaera mediterranea* | 0.2 | 1.6 | 0.0 | 2.0 | 0.1 | 1.8 |
| *Mesotaenium berggrenii* | 0.0 | 0.0 | 2.3 | 9.9 | 1.0 | 4.5 |
| *Monosiga marina* | 0.0 | 0.8 | 0.0 | 0.0 | 0.0 | 0.4 |
| *Octactis octonaria* | 0.0 | 0.8 | 0.0 | 1.0 | 0.0 | 0.9 |
| *Octactis speculum* | 0.2 | 5.7 | 0.1 | 23.8 | 0.2 | 13.8 |
| *Parapedinella reticulata* | 0.0 | 0.0 | 0.0 | 3.0 | 0.0 | 1.3 |
| *Phaeocystis pouchetii* | 0.2 | 14.6 | 0.0 | 4.0 | 0.1 | 9.8 |
| *Pterosperma* spp. | 0.1 | 7.3 | 0.1 | 13.9 | 0.1 | 10.3 |
| *Pyramimonas nansenii* | 0.5 | 19.5 | 0.0 | 3.0 | 0.3 | 12.1 |
| *Pyramimonas* spp. | 0.1 | 11.4 | 0.0 | 2.0 | 0.0 | 7.1 |
| *Pyramimonas virginica* | 0.0 | 4.1 | 0.0 | 0.0 | 0.0 | 2.2 |
| *Raphidosphaera tenerrima* | 0.0 | 0.0 | 0.0 | 2.0 | 0.0 | 0.9 |
| *Rhodomonas* spp. | 0.0 | 1.6 | 0.0 | 0.0 | 0.0 | 0.9 |
| *Scenedesmus quadricauda* | 0.0 | 0.8 | 0.0 | 0.0 | 0.0 | 0.4 |
| *Scotiella* spp. | 0.0 | 0.8 | 0.0 | 0.0 | 0.0 | 0.4 |
| *Teleaulax* spp. | 0.0 | 5.7 | 0.0 | 0.0 | 0.0 | 3.1 |
| *Telonema* spp. | 0.0 | 0.8 | 0.0 | 0.0 | 0.0 | 0.4 |
| *Telonema subtile* | 0.0 | 4.9 | 0.0 | 3.0 | 0.0 | 4.0 |
| *Trochiscia americana* | 0.0 | 0.0 | 1.1 | 4.0 | 0.5 | 1.8 |
| *Trochiscia cryophila* | 0.0 | 0.0 | 3.3 | 27.7 | 1.5 | 12.5 |
| **Ciliates** |  |  |  |  |  |  |
| *Acanthostomella norvegica* | 0.0 | 0.8 | 0.0 | 0.0 | 0.0 | 0.4 |
| *Didinium* spp. | 0.0 | 0.8 | 0.0 | 0.0 | 0.0 | 0.4 |
| *Euplotes* spp. | 0.0 | 3.3 | 0.0 | 2.0 | 0.0 | 2.7 |
| *Leegaardiella sol* | 0.0 | 1.6 | 0.0 | 0.0 | 0.0 | 0.9 |
| *Lohmanniella oviformis* | 0.0 | 2.4 | 0.0 | 0.0 | 0.0 | 1.3 |
| *Mesodinium rubrum* | 0.8 | 20.3 | 0.0 | 0.0 | 0.4 | 11.2 |
| *Salpingella secata* | 0.0 | 0.8 | 0.0 | 0.0 | 0.0 | 0.4 |
| *Strombidium* spp. | 0.0 | 0.8 | 0.0 | 1.0 | 0.0 | 0.9 |
| *Uronema marinum* | 0.0 | 0.8 | 0.0 | 0.0 | 0.0 | 0.4 |
